# Supplementary material
Source: MDPI journal article supplement (https://www.mdpi.com/2073-8994/13/10/1821)
Supplement: s1 [file s1]

Archive with 5 entries (5 files):
- supp_table S1.pdf
- supp_table S2.pdf
- supp_video1_FA_on_shape.mp4
- supp_video2_DA_on_shape.mp4
- Supplement figure S1.pdf
