# Supplementary material
Source: MDPI journal article supplement (https://www.mdpi.com/2073-8994/13/10/1821)
Supplement: s1 [file s1 › supp_table S1.pdf]

**Supplementary Table S1: Mean and standard deviation of individual fluctuating and directional asymmetry scores at the baseline observation and the 6 months observation for the whole sample**

|                                                                                                                       |                | BASELINE        | 6 MONTHS        |
|-----------------------------------------------------------------------------------------------------------------------|----------------|-----------------|-----------------|
| FA SCORE                                                                                                              | Mean<br>(SD**) | 0.0267 (0.0073) | 0.0259 (0.0071) |
| ***Mann–Whitney U = 922; p–value = 0.608                                                                              |                |                 |                 |
| DA SCORE                                                                                                              | Mean<br>(SD**) | 0.0684 (0.0158) | 0.064 (0.0147)  |
| ***Mann–Whitney U = 826; p–value = 0.192                                                                              |                |                 |                 |
| <p>* p–value &lt; 0.05 is statistically significant</p> <p>**SD=standard deviation</p> <p>*** U–Mann–Whitney test</p> |                |                 |                 |
