# Supplementary material
Source: MDPI journal article supplement (https://www.mdpi.com/2073-8994/13/10/1821)
Supplement: s1 [file s1 › supp_table S2.pdf]

**Supplementary Table S2: Mean and standard deviation of individual fluctuating and directional asymmetry scores of males and females of the whole sample**

|                                                                                                                       |                | MALES          | FEMALES         |
|-----------------------------------------------------------------------------------------------------------------------|----------------|----------------|-----------------|
| FA SCORE                                                                                                              | Mean<br>(SD**) | 0.0232 (0.006) | 0.0279 (0.0072) |
| ***Mann–Whitney U = 561; p–value = 0.006                                                                              |                |                |                 |
| DA SCORE                                                                                                              | Mean<br>(SD**) | 0.0589 (0.012) | 0.07 (0.015)    |
| ***Mann–Whitney U = 509; p–value = 0.001*                                                                             |                |                |                 |
| <p>* p–value &lt; 0.05 is statistically significant</p> <p>**SD=standard deviation</p> <p>*** U–Mann–Whitney test</p> |                |                |                 |
