# Supplementary material
Source: MDPI journal article supplement (https://www.mdpi.com/2073-8994/13/10/1821)

**Supplementary figure S1: Plot of the residuals of the OLS regression of the BMI on the Cobb angle. A normal distribution is evidenced in the model.**

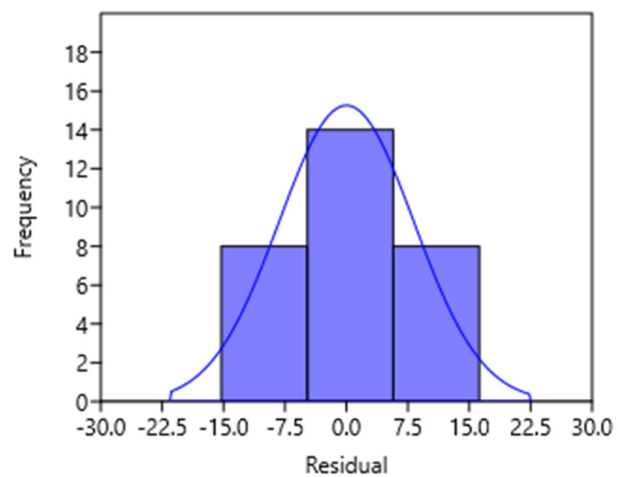

Supplement: s1 [file s1 › Supplement figure S1.pdf]
